# Supplementary material for: Crystal structure prediction of flexible pharmaceutical-like molecules: density functional tight-binding as an intermediate optimisation method and for free energy estimation
Source: Royal Society of Chemistry journal article supplement (doi:10.1039/c8fd00010g), 2018-01-01
Supplement: c8fd00010g1.pdf [file c8fd00010g1.pdf]

# Electronic Supplementary information (ESI). Crystal structure prediction of flexible pharmaceutical-like molecules: density functional tight-binding as an intermediate optimisation method and for free energy estimation.

Luca Iuzzolino, Patrick McCabe, Sarah L. Price and Jan Gerit Brandenburg

## Table of Contents

|                                                                                                                  |    |
|------------------------------------------------------------------------------------------------------------------|----|
| 1. APPLICATION OF THE WORKFLOW .....                                                                             | 2  |
| 1.1 Clustering procedure .....                                                                                   | 2  |
| 1.2 Energy distributions of the crystal structures at each stage of the workflow .....                           | 2  |
| 1.3 Re-optimisation of some key generated crystal structures with CrystalOptimizer .....                         | 6  |
| 2. RESULTS OF THE WORKFLOW .....                                                                                 | 7  |
| 2.1 Crystal energy landscapes .....                                                                              | 7  |
| 2.2 Reproduction of the experimental conformers .....                                                            | 9  |
| 2.3 Reproduction of some key putative polymorphs (PPMs) from previous CSP studies .....                          | 10 |
| 2.3.1 Correlation between DFTB-B3 energies and $\Psi_{\text{mol}}^{\text{PBE0+FIT}}$ energies for the PPMs ..... | 16 |
| 2.3.2 Reproduction of the PPMs of molecule XX produced with the RCM method .....                                 | 17 |
| 2.3.3 Optimisation of some $Z'=2$ putative crystal structures of molecule XX .....                               | 17 |
| 2.4 Phonon calculations .....                                                                                    | 18 |
| 2.5 Computational cost .....                                                                                     | 20 |

# 1. APPLICATION OF THE WORKFLOW

## 1.1 Clustering procedure

The clustering procedure was used to find and remove duplicate crystal structures, to simplify both the calculations and the analysis of the final results. In this work, duplicates were found overlaying structures with the Crystal Packing Similarity tool available through the CSD Python API. Crystal structures were considered as duplicates if it was possible to match 15/15 molecules, with 20% distance and 20° angle tolerances, and if the root mean square deviation (RMSD<sub>15</sub>) was smaller than 0.5 Å after the DFTB3-D3 optimisations and 1 Å after the DMACRYS optimisations; different thresholds were introduced to avoid removal after the intermediate optimisation of any structures that could have gone to a different E<sub>latt</sub> minimum after the final stage. If the structures had a different number of molecules in the asymmetric unit (Z'), the RMSD<sub>15</sub> threshold was reduced to 0.1 Å, to save isostructural polymorphs with different Z' and in different space groups. When two structures were found to be duplicates, the lower-energy one was kept, and the higher-energy one was removed.

## 1.2 Energy distributions of the crystal structures at each stage of the workflow

For CrystalPredictor, an E<sub>latt</sub> cut-off of 40 kJ·mol<sup>-1</sup> was imposed, hence only structures up to this level were considered and are shown in the plots. Horizontal lines indicate the energies of the structure(s) matching the experimental one(s) relative to the global minimum in E<sub>latt</sub> at each stage of the workflow. The plot for molecule XXVI is shown as Figure 2 in the main paper.

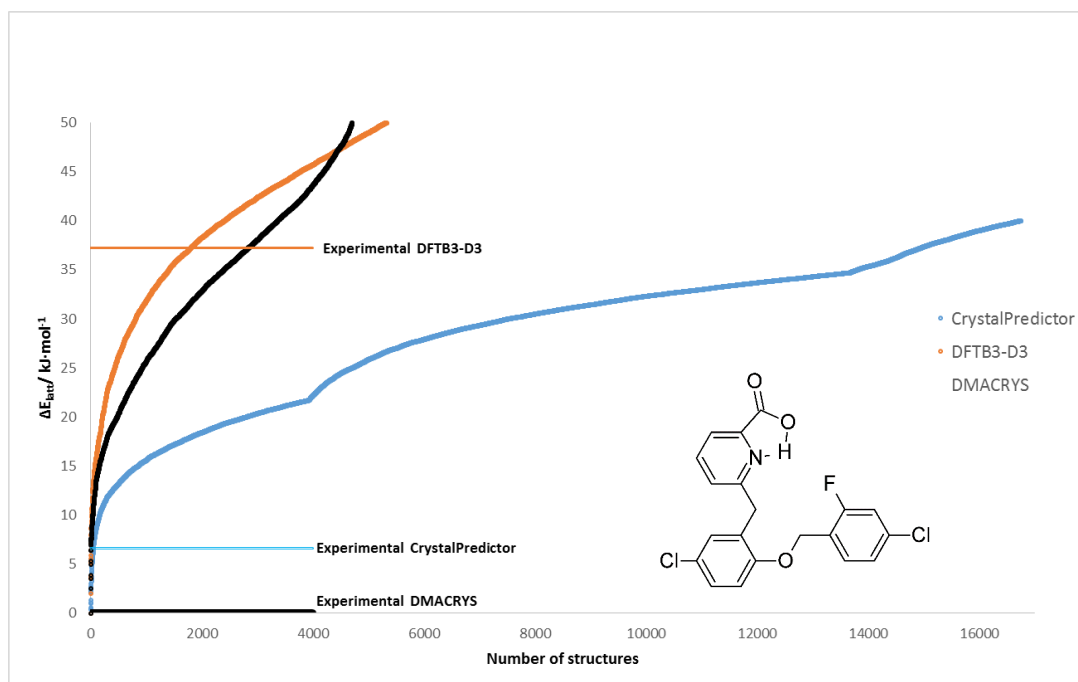

Figure 1: Plot showing the energy distribution of the computer-generated crystal structures of GSK269984B at the various stages of our CSP procedure.

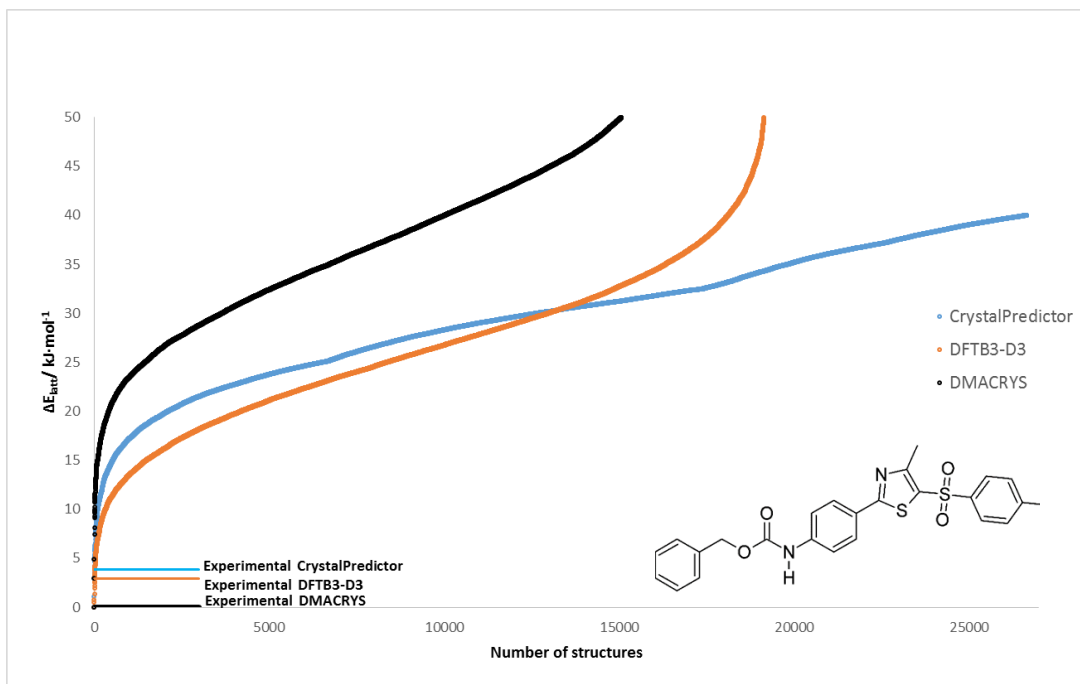

Figure 2: Plot showing the energy distribution of the computer-generated crystal structures of molecule XX at the various stages of our CSP procedure.

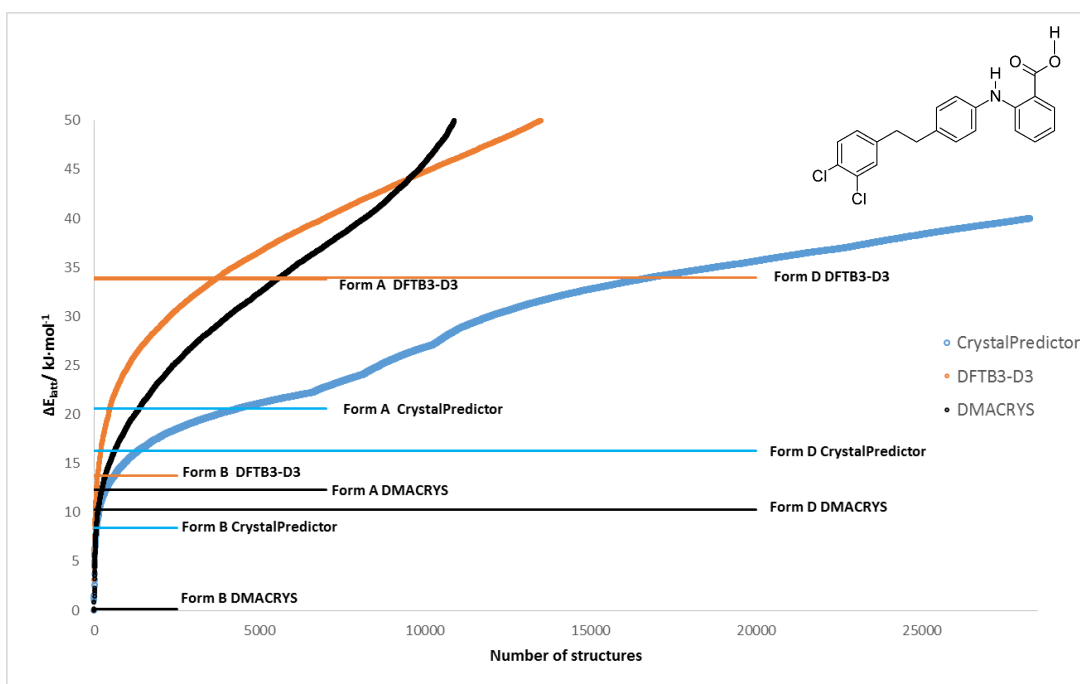

Figure 3: Plot showing the energy distribution of the computer-generated crystal structures of molecule XXIII at the various stages of our CSP procedure.

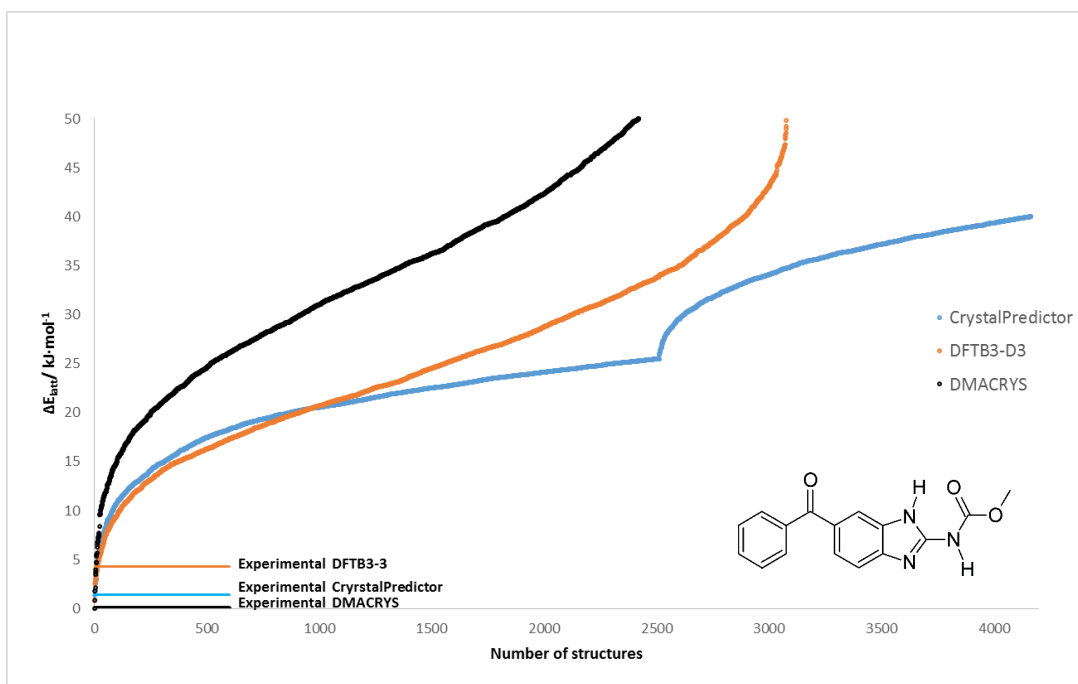

**Figure 4: Plot showing the energy distribution of the computer-generated crystal structures of the A-tautomer of mebendazole at the various stages of our CSP procedure.**

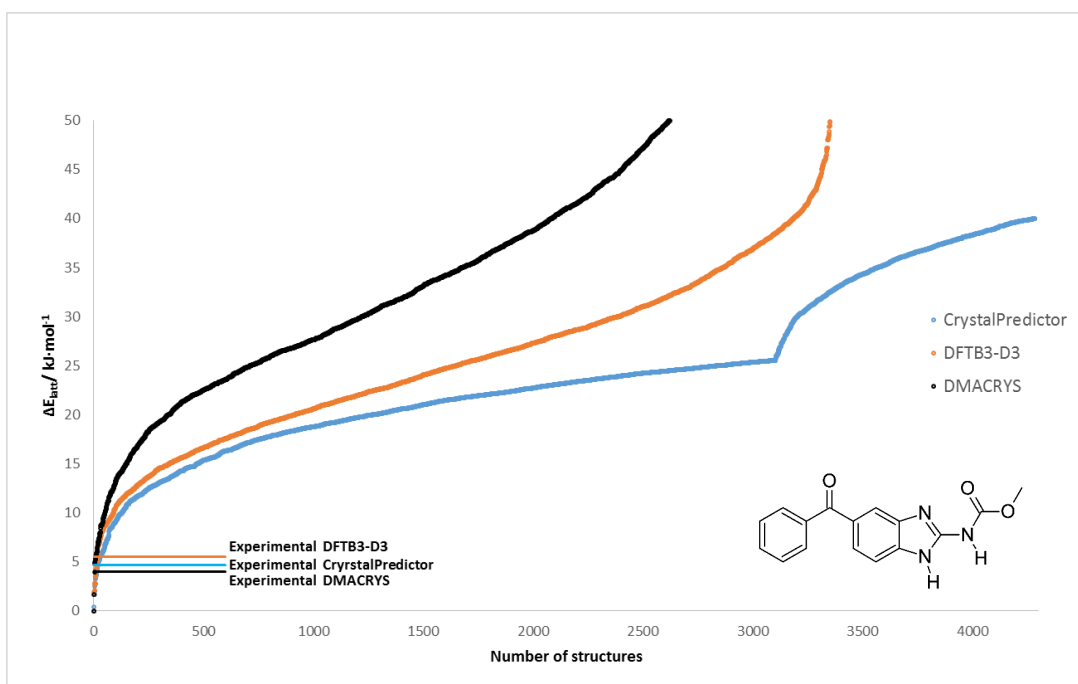

**Figure 5: Plot showing the energy distribution of the computer-generated crystal structures of the C-tautomer of mebendazole at the various stages of our CSP procedure.**

Table 1 shows how the DFTB3-D3 step reduced the number of structures to be considered, breaking down the various components of this reduction. The results of the clustering procedure described in section 1.1 are also broken down to differentiate between crystal structures that would have already been considered as duplicates before the DFTB3-D3

optimisation if the same clustering method had been employed and those that only became duplicates after the optimisations.

**Table 1: Origin of the reduction in the number of crystal structures after the DFTB3-D3 optimisations.**

|                                                                         | XXVI                 |              | GSK269984B           |              | XXIII                |              | XX                   |              | Mebendazole A        |              | Mebendazole C        |              |
|-------------------------------------------------------------------------|----------------------|--------------|----------------------|--------------|----------------------|--------------|----------------------|--------------|----------------------|--------------|----------------------|--------------|
|                                                                         | Number of structures | % of initial |
| <b>Original CrystalPredictor structures</b>                             | 9215                 | 100.0        | 16744                | 100.0        | 28249                | 100.0        | 26650                | 100.0        | 4165                 | 100.0        | 4284                 | 100.0        |
| <b>Removing structures becoming duplicates after DFTB3-D3</b>           | 8821                 | 95.7         | 16569                | 99.0         | 27866                | 98.6         | 26278                | 98.6         | 4147                 | 99.6         | 4267                 | 99.6         |
| <b>Removing wrong molecules*</b>                                        | 8583                 | 93.1         | 16270                | 97.1         | 27866                | 98.6         | 26098                | 97.9         | 4124                 | 99           | 4238                 | 98.9         |
| <b>Clustering DFTB3-D3 with looser criteria</b>                         | 7534                 | 81.8         | 13829                | 82.6         | 23682                | 83.8         | 19251                | 72.2         | 3083                 | 74.0         | 3362                 | 78.5         |
| <b>Applying the 50 kJ·mol<sup>-1</sup> cut-off to DFTB3-D3 energies</b> | 3346                 | 36.3         | 5238                 | 31.3         | 13490                | 47.8         | 19146                | 71.8         | 3078                 | 73.9         | 3352                 | 78.2         |

\*In a few cases the DFTB3-D3 optimisation wrongly changed the covalent bonding of the molecule.

1.3 Re-optimisation of some key generated crystal structures with CrystalOptimizer

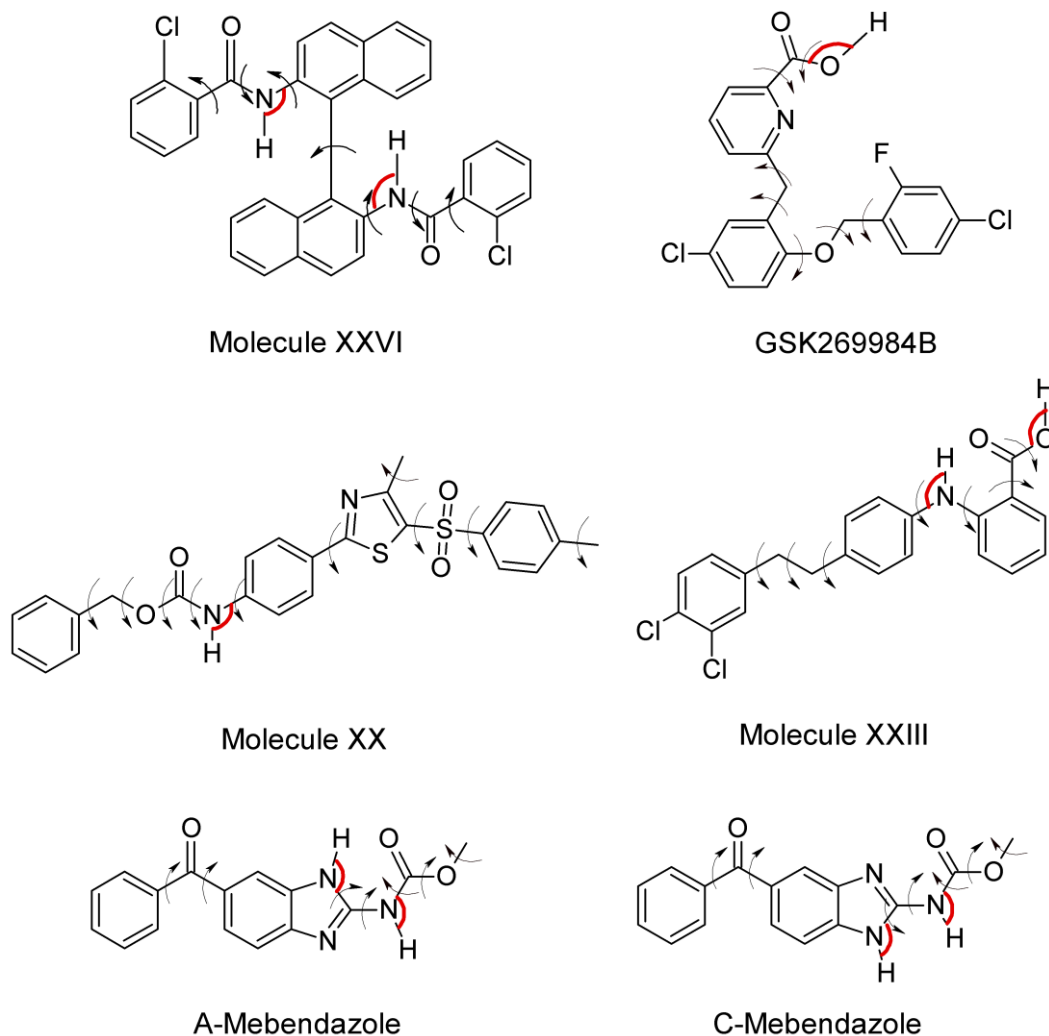

**Figure 6: Chemical diagrams of each molecule, with indicated torsion-angles (black arrows) and bond-angles (red arcs) treated as independent degrees of freedom in the CrystalOptimizer optimisations of the key generated crystal structures.**

## 2. RESULTS OF THE WORKFLOW

### 2.1 Crystal energy landscapes

Each point in the crystal energy landscapes corresponds to a distinct  $E_{\text{latt}}$  minimum found after the final DMACRYS optimisations. For each minimum,  $E_{\text{latt}}$  calculated by Gaussian and DMACRYS is plotted against the density. The structure(s) matching the experimental one(s) are also indicated. The crystal energy landscapes of molecules XX and XXIII are shown in Figure 3 in the main paper.

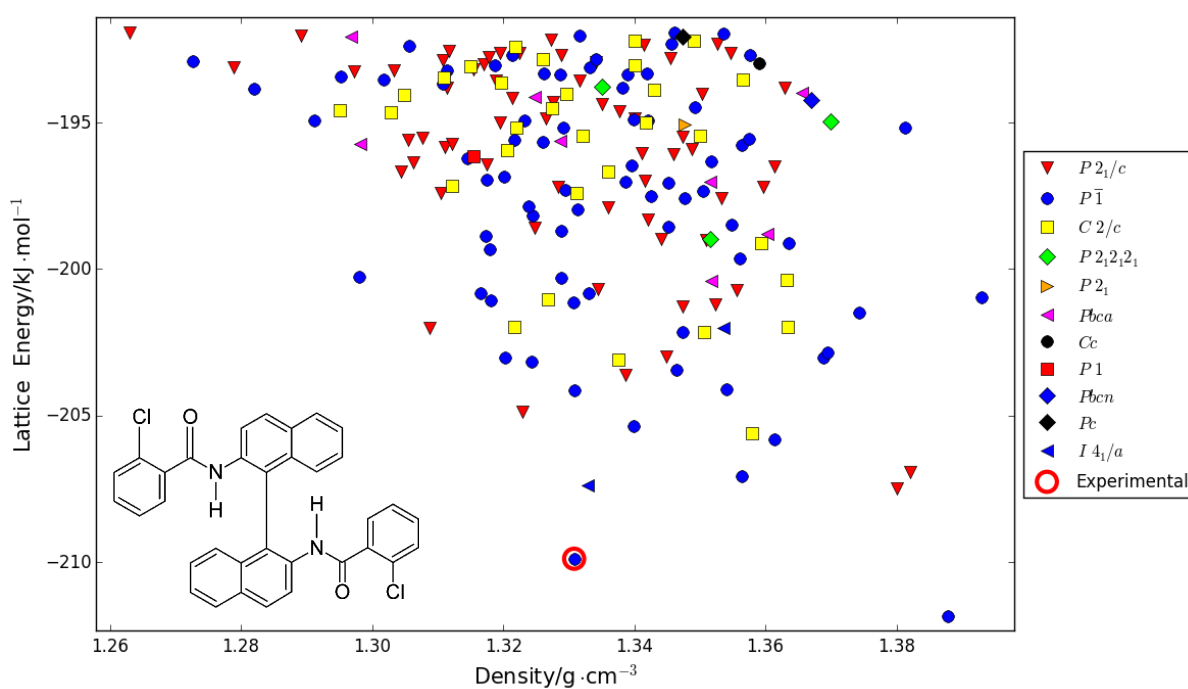

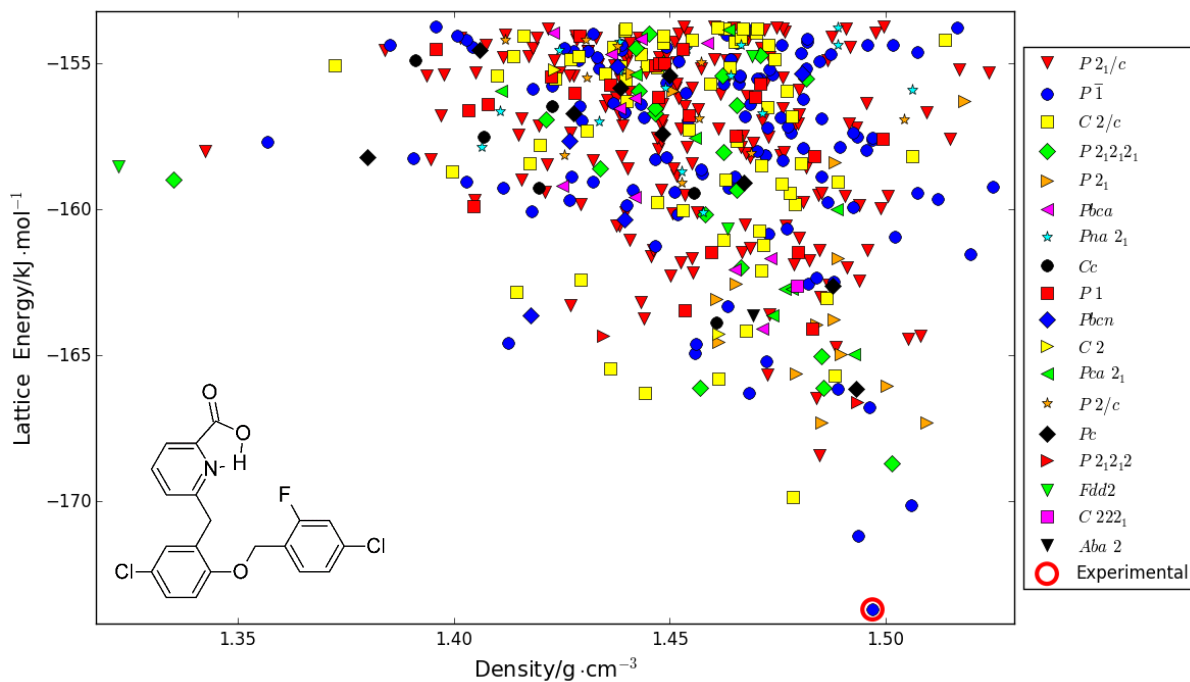

Figure 8: Crystal energy landscape for GSK269984B.

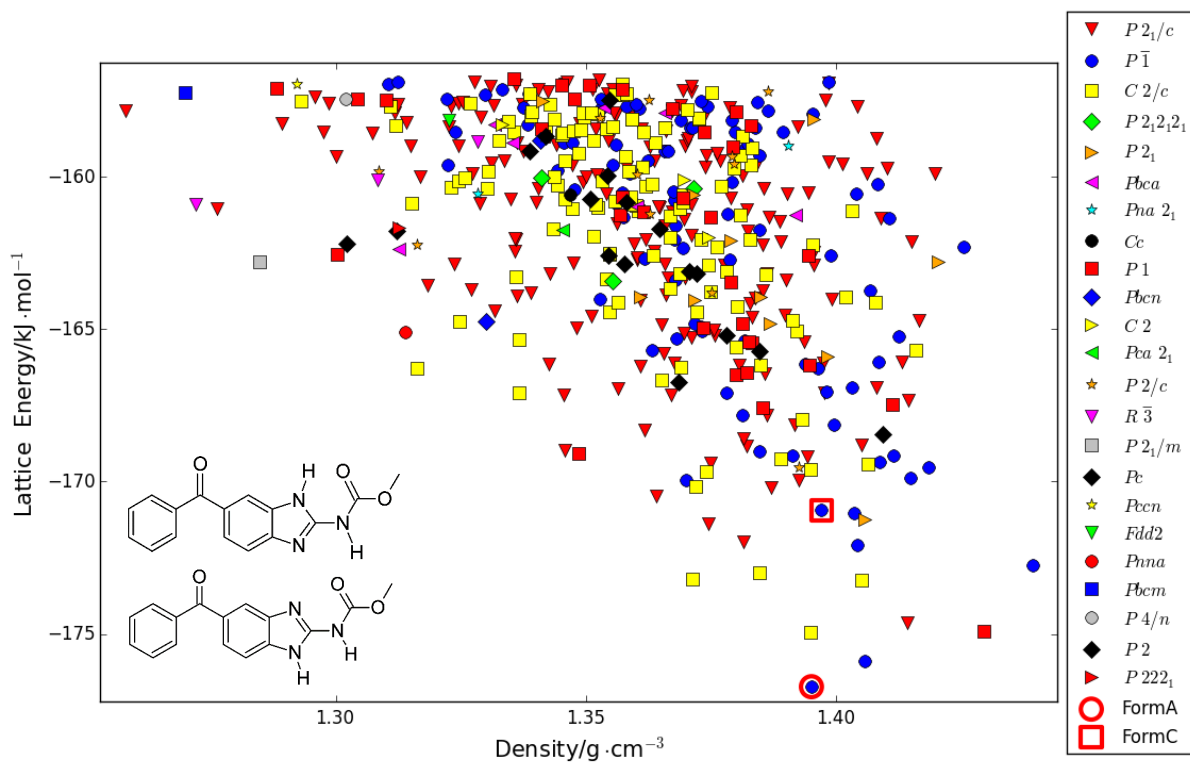

Figure 9: Crystal energy landscape for the two tautomers of mebendazole.



## 2.2 Reproduction of the experimental conformers

**Table 2:** For each molecule, overlay of the experimental conformer (coloured by element), the conformer within the CrystalPredictor-generated crystal structure corresponding to it and optimised with DFTB3-D3 (in red), and the conformer within the same structure optimised with CrystalOptimizer (in blue). The RMSD<sub>1</sub> for overlaying the experimental conformers and the optimised ones are also shown. Hydrogen atoms are not shown to facilitate the visualisation.

|                                                                                                                                                                                                    |                                                                                                                                                                                                      |
|----------------------------------------------------------------------------------------------------------------------------------------------------------------------------------------------------|------------------------------------------------------------------------------------------------------------------------------------------------------------------------------------------------------|
| 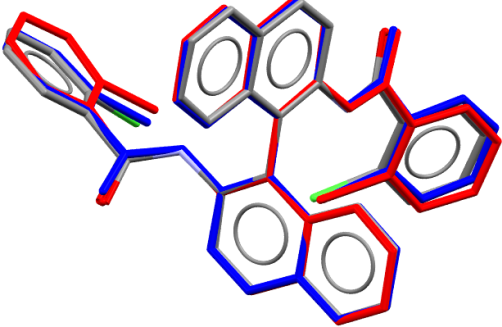 <p>Molecule XXVI, DFTB3-D3 RMSD<sub>1</sub> = 0.133 Å, CrystalOptimizer RMSD<sub>1</sub> = 0.123 Å</p>           |  <p>GSK269984B, DFTB3-D3 RMSD<sub>1</sub> = 0.071 Å, CrystalOptimizer RMSD<sub>1</sub> = 0.094 Å</p>              |
|  <p>Molecule XX, DFTB3-D3 RMSD<sub>1</sub> = 0.137 Å, CrystalOptimizer RMSD<sub>1</sub> = 0.101 Å</p>             |  <p>Molecule XXIII form a, DFTB3-D3 RMSD<sub>1</sub> = 0.216 Å, CrystalOptimizer RMSD<sub>1</sub> = 0.212 Å</p>  |
|  <p>Molecule XXIII form b, DFTB3-D3 RMSD<sub>1</sub> = 0.180 Å, CrystalOptimizer RMSD<sub>1</sub> = 0.159 Å</p> |  <p>Molecule XXIII form d, DFTB3-D3 RMSD<sub>1</sub> = 0.278 Å, CrystalOptimizer RMSD<sub>1</sub> = 0.237 Å</p> |
|  <p>Mebendazole form A, DFTB3-D3 RMSD<sub>1</sub> = 0.176 Å, CrystalOptimizer RMSD<sub>1</sub> = 0.143 Å</p>    |  <p>Mebendazole form C, DFTB3-D3 RMSD<sub>1</sub> = 0.067 Å, CrystalOptimizer RMSD<sub>1</sub> = 0.066 Å</p>    |

### 2.3 Reproduction of some key putative polymorphs (PPMs) from previous CSP studies

Tables 3-7 show the results of the analysis that was performed to determine whether the set of crystal structures optimised with our methodology contained each of the PPMs found in the previous CSP studies, and used in a previous work to test a new workflow for crystal structure generation. Note that for these comparisons, the structures from this study were overlaid with the optimised computer-generated ones from the previous studies, with the exception of form A of XXIII, which was not found in the original study. This explains some of the differences between the data shown here and in Tables 1 and 2 in the main paper. As a further comparison, the relative energies and geometries of the structures matching the PPMs (see section 2.3 in the main paper for details) were also compared with those found by re-optimising the same crystal structures, starting from the CrystalPredictor minima, with CrystalOptimizer at the PBE0 6-31G(d,p) level of theory, using the independent degrees of freedom shown in Figure 6. For the CrystalOptimizer-optimised structures,  $\Delta E_{\text{intra}}$  was determined relative to the Gaussian09-minimised gas-phase minima of each molecule. The energies are shown relative to the lowest energy one within the CrystalOptimizer-optimised set.

In a few cases, the distance and angle tolerances had to be increased to 30% and 30° respectively to obtain a match between the crystal structures optimised with the  $\Psi_{\text{mol}}^{\text{PBE0+FIT}}$  method and the PPMs or the CrystalOptimizer-optimised structures. In those cases, the RMSD<sub>15</sub> values for these structures are shown in italics.

Table 3: Reproduction and ranking of the most important PPMs from the original CSP study of molecule XXVI. The structure highlighted in green corresponds to the experimental structure. The structures which were in the original CSP and where a good match was not found in this work are classified: in blue where they were not found by the search, in turquoise where they had a poor match in the search, and in red where structures were missed despite having a good match in the search. The structures in orange were found after  $\Psi_{mol}^{PBEO+FIT}$  at  $\Delta E_{latt} > 20$  kJ·mol<sup>-1</sup>.

| Structure name | Found ?           | Previous CSP ranking | Ranking after $\Psi_{mol}^{PBEO+FIT}$ | $\Delta E_{latt}$ previous study/kJ·mol <sup>-1</sup> | $\Delta E_{latt}$ after $\Psi_{mol}^{PBEO+FIT}$ /kJ·mol <sup>-1</sup> | PPM and $\Psi_{mol}^{PBEO+FIT}$ optimised rmsd <sub>15</sub> | $\Delta E_{latt}$ after CrystalOptimizer optimisation/kJ·mol <sup>-1</sup> | CrystalOptimizer and $\Psi_{mol}^{PBEO+FIT}$ optimised rmsd <sub>15</sub> |
|----------------|-------------------|----------------------|---------------------------------------|-------------------------------------------------------|-----------------------------------------------------------------------|--------------------------------------------------------------|----------------------------------------------------------------------------|---------------------------------------------------------------------------|
| 3525           | YES               | 1                    | 7                                     | 0.00                                                  | 6.03                                                                  | 0.48                                                         | 0.23                                                                       | 0.447                                                                     |
| 1600           | YES               | 2                    | 2                                     | 0.49                                                  | 1.96                                                                  | 0.528                                                        | 0.00                                                                       | 0.541                                                                     |
| 675            | YES               | 3                    | 10                                    | 2.60                                                  | 6.97                                                                  | 0.284                                                        | 3.45                                                                       | 0.287                                                                     |
| 38             | YES               | 4                    | 4                                     | 4.15                                                  | 4.45                                                                  | 0.195                                                        | 5.17                                                                       | 0.209                                                                     |
| 421            | YES               | 5                    | 10                                    | 5.43                                                  | 6.97                                                                  | 0.286                                                        | 3.43                                                                       | 0.284                                                                     |
| 3104           | YES               | 6                    | 33                                    | 5.65                                                  | 10.90                                                                 | 0.178                                                        | 6.63                                                                       | 0.26                                                                      |
| 615            | YES               | 7                    | 91                                    | 6.28                                                  | 16.12                                                                 | 0.37                                                         | 6.79                                                                       | 0.271                                                                     |
| 239            | YES               | 8                    | 29                                    | 6.38                                                  | 10.63                                                                 | 0.389                                                        | 6.94                                                                       | 0.425                                                                     |
| 2930           | YES               | 9                    | 161                                   | 6.56                                                  | 18.99                                                                 | 0.421                                                        | 3.70                                                                       | 0.348                                                                     |
| 354            | YES               | 10                   | 147                                   | 6.88                                                  | 18.58                                                                 | 0.398                                                        | 8.31                                                                       | 0.372                                                                     |
| 851            | YES (high energy) | 11                   | 272                                   | 7.04                                                  | 22.54                                                                 | 0.359                                                        | 7.43                                                                       | 0.366                                                                     |
| 6460           | YES               | 12                   | 31                                    | 7.11                                                  | 10.79                                                                 | 0.931                                                        | 8.26                                                                       | 0.577                                                                     |
| 6335           | YES               | 13                   | 100                                   | 7.45                                                  | 16.41                                                                 | 0.452                                                        | 8.15                                                                       | 0.379                                                                     |
| 221            | YES               | 14                   | 31                                    | 7.46                                                  | 10.79                                                                 | 0.483                                                        | 8.29                                                                       | 0.569                                                                     |
| 2231           | YES               | 15                   | 5                                     | 7.57                                                  | 4.77                                                                  | 0.33                                                         | 6.32                                                                       | 0.52                                                                      |
| 2496           | NOT IN SEARCH     | 16                   | \                                     | 7.93                                                  | \                                                                     | \                                                            | \                                                                          | \                                                                         |
| 185            | YES (high energy) | 17                   | 369                                   | 8.10                                                  | 24.61                                                                 | 0.621                                                        | 9.05                                                                       | 0.643                                                                     |
| 4201           | POOR IN SEARCH    | 18                   | \                                     | 8.21                                                  | \                                                                     | \                                                            | \                                                                          | \                                                                         |
| 314            | YES               | 19                   | 23                                    | 8.22                                                  | 9.83                                                                  | 0.322                                                        | 10.55                                                                      | 0.334                                                                     |
| 508            | YES               | 20                   | 132                                   | 8.29                                                  | 18.02                                                                 | 0.298                                                        | 7.16                                                                       | 0.336                                                                     |
| 4946           | YES               | 21                   | 165                                   | 19.14                                                 | 16.30                                                                 | 0.475                                                        | 5.09                                                                       | 0.66                                                                      |
| 6879           | YES               | 22                   | 115                                   | 8.51                                                  | 17.18                                                                 | 0.229                                                        | 10.33                                                                      | 0.191                                                                     |
| 506            | YES               | 23                   | 59                                    | 8.62                                                  | 13.98                                                                 | 0.481                                                        | 10.05                                                                      | 0.421                                                                     |
| 4842           | YES               | 24                   | 46                                    | 8.83                                                  | 12.85                                                                 | 0.645                                                        | 7.03                                                                       | 0.591                                                                     |
| 43             | YES               | 25                   | 3                                     | 9.02                                                  | 4.35                                                                  | 0.439                                                        | 9.03                                                                       | 0.559                                                                     |
| 1236           | YES               | 26                   | 8                                     | 9.15                                                  | 6.24                                                                  | 0.318                                                        | 9.48                                                                       | 0.28                                                                      |
| 1537           | YES               | 27                   | 12                                    | 9.16                                                  | 7.76                                                                  | 0.334                                                        | 9.73                                                                       | 0.39                                                                      |
| 188            | YES               | 28                   | 14                                    | 9.41                                                  | 8.39                                                                  | 0.942                                                        | 9.47                                                                       | 0.925                                                                     |
| 5126           | YES               | 29                   | 180                                   | 10.05                                                 | 19.77                                                                 | 0.513                                                        | 10.54                                                                      | 0.428                                                                     |
| 444            | YES               | 30                   | 6                                     | 10.12                                                 | 4.92                                                                  | 0.137                                                        | 9.64                                                                       | 0.152                                                                     |
| 544            | YES (high energy) | 31                   | 272                                   | 10.28                                                 | 22.54                                                                 | 0.377                                                        | 7.44                                                                       | 0.366                                                                     |
| 686            | YES               | 32                   | 25                                    | 10.34                                                 | 9.86                                                                  | 0.211                                                        | 10.78                                                                      | 0.166                                                                     |
| 89             | POOR IN SEARCH    | 33                   | \                                     | 10.44                                                 | \                                                                     | \                                                            | \                                                                          | \                                                                         |
| 20             | YES               | 34                   | 70                                    | 10.69                                                 | 14.78                                                                 | 0.932                                                        | \                                                                          | no overlay                                                                |
| 83             | YES               | 35                   | 88                                    | 10.82                                                 | 15.93                                                                 | 0.398                                                        | 10.74                                                                      | 0.34                                                                      |
| 2591           | NO                | 132                  | \                                     | 17.03                                                 | \                                                                     | \                                                            | \                                                                          | \                                                                         |

Table 4: Reproduction and ranking of the most important PPMs from the original CSP study of GSK269984B. The structure highlighted in green corresponds to the experimental structure. The structures which were in the original CSP and where a good match was not found in this work are classified: in blue where they were not found by the search, in turquoise where they had a poor match in the search, and in red where structures were missed despite having a good match in the search. The structures in orange were found after  $\Psi_{mol}^{PBEO+FIT}$  at  $\Delta E_{latt} > 20$  kJ·mol<sup>-1</sup>.

| Structure name | Found ?           | Previous CSP ranking | Ranking after $\Psi_{mol}^{PBEO+FIT}$ | $\Delta E_{latt}$ previous CSP study/kJ·mol <sup>-1</sup> | $\Delta E_{latt}$ after $\Psi_{mol}^{PBEO+FIT}$ /kJ·mol <sup>-1</sup> | PPM and $\Psi_{mol}^{PBEO+FIT}$ optimised rmsd <sub>15</sub> | $\Delta E_{latt}$ after CrystalOptimizer optimisation/kJ·mol <sup>-1</sup> | CrystalOptimizer and $\Psi_{mol}^{PBEO+FIT}$ optimised rmsd <sub>15</sub> |
|----------------|-------------------|----------------------|---------------------------------------|-----------------------------------------------------------|-----------------------------------------------------------------------|--------------------------------------------------------------|----------------------------------------------------------------------------|---------------------------------------------------------------------------|
| 180Intra10     | YES               | 1                    | 1                                     | 0.00                                                      | 0.00                                                                  | 0.135                                                        | 0.00                                                                       | 0.145                                                                     |
| 90InterB36     | YES (high energy) | 2                    | 684                                   | 0.53                                                      | 22.50                                                                 | 0.525                                                        | 17.13                                                                      | 0.416                                                                     |
| 180InterA11    | YES (high energy) | 3                    | 543                                   | 2.06                                                      | 20.84                                                                 | 0.407                                                        | 16.72                                                                      | 0.184                                                                     |
| 180InterA8     | YES               | 4                    | 17                                    | 2.76                                                      | 7.59                                                                  | 0.581                                                        | 10.83                                                                      | 0.223                                                                     |
| 180InterB6     | YES (high energy) | 5                    | 820                                   | 3.26                                                      | 23.91                                                                 | 0.34                                                         | 19.79                                                                      | 0.204                                                                     |
| 180Intra8      | YES               | 6                    | 179                                   | 3.55                                                      | 15.50                                                                 | 0.375                                                        | 8.56                                                                       | 0.362                                                                     |
| 180Intra38     | POOR IN SEARCH    | 7                    | \                                     | 3.62                                                      | \                                                                     | \                                                            | \                                                                          | \                                                                         |
| 180InterB9     | YES               | 8                    | 278                                   | 3.80                                                      | 17.36                                                                 | 0.394                                                        | 8.58                                                                       | 0.383                                                                     |
| 180Intra76     | YES               | 9                    | 98                                    | 4.24                                                      | 13.15                                                                 | 0.47                                                         | 8.51                                                                       | 0.494                                                                     |
| 180InterA22    | YES               | 10                   | 269                                   | 4.36                                                      | 17.24                                                                 | 0.726                                                        | 17.97                                                                      | 0.461                                                                     |
| 90InterB6      | NOT IN SEARCH     | 11                   | \                                     | 4.61                                                      | \                                                                     | \                                                            | \                                                                          | \                                                                         |
| 180Intra19     | YES               | 12                   | 23                                    | 4.66                                                      | 8.28                                                                  | 0.189                                                        | 10.27                                                                      | 0.2                                                                       |
| 180Intra74     | YES               | 13                   | 34                                    | 5.00                                                      | 9.38                                                                  | 0.366                                                        | 9.42                                                                       | 0.373                                                                     |
| 180Intra4      | YES               | 14                   | 42                                    | 5.04                                                      | 9.93                                                                  | 0.385                                                        | 9.26                                                                       | 0.364                                                                     |
| 180InterA60    | YES               | 15                   | 404                                   | 5.08                                                      | 19.19                                                                 | 0.161                                                        | 16.73                                                                      | 0.135                                                                     |
| 180Intra2      | YES               | 16                   | 6                                     | 5.16                                                      | 5.28                                                                  | 0.204                                                        | 6.85                                                                       | 0.214                                                                     |
| 180InterA3     | NOT IN SEARCH     | 17                   | \                                     | 5.32                                                      | \                                                                     | \                                                            | \                                                                          | \                                                                         |
| 180InterA30    | YES               | 18                   | 329                                   | 5.39                                                      | 18.30                                                                 | 0.094                                                        | 17.62                                                                      | 0.14                                                                      |
| 180Intra83     | NOT IN SEARCH     | 19                   | \                                     | 5.40                                                      | \                                                                     | \                                                            | \                                                                          | \                                                                         |
| 180Intra56     | POOR IN SEARCH    | 20                   | \                                     | 5.44                                                      | \                                                                     | \                                                            | \                                                                          | \                                                                         |
| 180InterA7     | YES               | 21                   | 417                                   | 5.81                                                      | 19.34                                                                 | 0.428                                                        | 17.44                                                                      | 0.497                                                                     |
| 90Intra31      | YES               | 22                   | 464                                   | 5.88                                                      | 19.81                                                                 | 0.368                                                        | 16.86                                                                      | 0.39                                                                      |
| 180Intra32     | YES               | 23                   | 169                                   | 6.15                                                      | 15.25                                                                 | 0.18                                                         | 12.68                                                                      | 0.199                                                                     |
| 180InterA18    | POOR IN SEARCH    | 24                   | \                                     | 6.19                                                      | \                                                                     | \                                                            | \                                                                          | \                                                                         |
| 180Intra92     | YES               | 25                   | 49                                    | 6.35                                                      | 10.40                                                                 | 0.932                                                        | 8.34                                                                       | 0.827                                                                     |
| 180InterA12    | YES               | 26                   | 483                                   | 6.47                                                      | 19.97                                                                 | 0.355                                                        | 18.20                                                                      | 0.265                                                                     |
| 180InterA29    | YES (high energy) | 27                   | 765                                   | 6.51                                                      | 23.34                                                                 | 0.298                                                        | 19.19                                                                      | 0.291                                                                     |
| 180InterB10    | YES (high energy) | 28                   | 1418                                  | 6.53                                                      | 29.12                                                                 | 0.471                                                        | 21.50                                                                      | 0.465                                                                     |
| 90InterA14     | NOT IN SEARCH     | 29                   | \                                     | 6.62                                                      | \                                                                     | \                                                            | \                                                                          | \                                                                         |
| 180Intra84     | YES               | 30                   | 61                                    | 6.67                                                      | 11.15                                                                 | 0.258                                                        | 8.54                                                                       | no overlay                                                                |
| 180Intra47     | YES               | 31                   | 77                                    | 6.72                                                      | 12.05                                                                 | 0.162                                                        | 11.28                                                                      | 0.192                                                                     |
| 180Intra65     | YES               | 32                   | 28                                    | 6.81                                                      | 8.78                                                                  | 0.116                                                        | 12.00                                                                      | 0.15                                                                      |
| 90InterA32     | YES (high energy) | 33                   | 1412                                  | 6.89                                                      | 29.09                                                                 | 0.26                                                         | 24.66                                                                      | 0.277                                                                     |
| 180Intra5      | YES               | 34                   | 56                                    | 6.94                                                      | 10.99                                                                 | 0.329                                                        | 11.61                                                                      | 0.315                                                                     |
| 180Intra28     | YES               | 35                   | 21                                    | 7.08                                                      | 8.06                                                                  | 0.208                                                        | 11.36                                                                      | 0.203                                                                     |
| 180Intra26     | YES               | 36                   | 483                                   | 7.16                                                      | 19.97                                                                 | 1.441                                                        | 18.28                                                                      | 0.295                                                                     |
| 180InterB87    | YES (high energy) | 37                   | 1051                                  | 7.18                                                      | 26.08                                                                 | 0.265                                                        | 20.29                                                                      | 0.306                                                                     |
| 180Intra57     | YES               | 38                   | 24                                    | 7.43                                                      | 8.50                                                                  | 0.764                                                        | 12.21                                                                      | 0.749                                                                     |

Table 5: Reproduction and ranking of the most important PPMs from the original CSP study of molecule XX. The structure highlighted in green corresponds to the experimental structure. The structures in red were missed despite having a good match in the search. The structures in orange were found after  $\Psi_{mol}^{PBE0+FIT}$  at  $\Delta E_{latt} > 20 \text{ kJ}\cdot\text{mol}^{-1}$ .

| Structure name | Found ?           | Previous CSP ranking | Ranking after $\Psi_{mol}^{PBE0+FIT}$ | $\Delta E_{latt}$ previous CSP study/ $\text{kJ}\cdot\text{mol}^{-1}$ | $\Delta E_{latt}$ after $\Psi_{mol}^{PBE0+FIT}$ / $\text{kJ}\cdot\text{mol}^{-1}$ | PPM and $\Psi_{mol}^{PBE0+FIT}$ optimised rmsd <sub>15</sub> | $\Delta E_{latt}$ after CrystalOptimizer optimisation/ $\text{kJ}\cdot\text{mol}^{-1}$ | CrystalOptimizer and $\Psi_{mol}^{PBE0+FIT}$ optimised rmsd <sub>15</sub> |
|----------------|-------------------|----------------------|---------------------------------------|-----------------------------------------------------------------------|-----------------------------------------------------------------------------------|--------------------------------------------------------------|----------------------------------------------------------------------------------------|---------------------------------------------------------------------------|
| dfAa132        | YES               | 1                    | 1                                     | 0.00                                                                  | 0.00                                                                              | 0.308                                                        | 0.00                                                                                   | 0.222                                                                     |
| dfAc102        | YES               | 2                    | 2                                     | 0.78                                                                  | 2.98                                                                              | 0.217                                                        | 2.16                                                                                   | 0.196                                                                     |
| dfAa180        | YES               | 3                    | 5                                     | 2.38                                                                  | 8.08                                                                              | 0.357                                                        | 3.01                                                                                   | 0.275                                                                     |
| dfAc14         | YES               | 5                    | 7                                     | 5.59                                                                  | 9.34                                                                              | 0.19                                                         | 5.37                                                                                   | 0.185                                                                     |
| dfAc48         | YES               | 10                   | 3                                     | 6.15                                                                  | 4.91                                                                              | 0.429                                                        | 8.83                                                                                   | 0.61                                                                      |
| dfAc19*        | YES               | 6                    | 6                                     | 6.42                                                                  | 9.13                                                                              | 0.658                                                        | 5.87                                                                                   | 0.321                                                                     |
| dfAc7          | YES               | 12                   | 14                                    | 7.26                                                                  | 9.97                                                                              | 0.186                                                        | 8.12                                                                                   | 0.363                                                                     |
| dfAc43         | NO                | 14                   | \                                     | 7.69                                                                  | \                                                                                 | \                                                            | \                                                                                      | \                                                                         |
| dfAc17         | YES               | 15                   | 9                                     | 7.86                                                                  | 9.72                                                                              | 0.307                                                        | 10.97                                                                                  | 0.582                                                                     |
| dfAc172        | YES               | 16                   | 25                                    | 7.97                                                                  | 11.53                                                                             | 0.528                                                        | 7.76                                                                                   | 0.634                                                                     |
| dfAc29         | YES               | 17                   | 129                                   | 8.19                                                                  | 15.70                                                                             | 0.49                                                         | 6.93                                                                                   | 0.454                                                                     |
| dfAb181        | YES (high energy) | 22                   | 1135                                  | 9.12                                                                  | 24.00                                                                             | 0.671                                                        | 10.14                                                                                  | 0.654                                                                     |
| dfAd152        | YES               | 23                   | 314                                   | 9.13                                                                  | 18.96                                                                             | 0.839                                                        | 8.33                                                                                   | 0.859                                                                     |
| dfAc86         | YES               | 24                   | 13                                    | 9.36                                                                  | 9.92                                                                              | 0.329                                                        | 8.91                                                                                   | 0.399                                                                     |
| dfAc67         | YES               | 25                   | 20                                    | 9.48                                                                  | 11.14                                                                             | 0.142                                                        | 9.39                                                                                   | 0.163                                                                     |
| dfAa277        | YES               | 27                   | 43                                    | 9.70                                                                  | 12.85                                                                             | 0.16                                                         | 9.12                                                                                   | 0.163                                                                     |
| dfAa4          | YES               | 28                   | 54                                    | 9.76                                                                  | 13.50                                                                             | 0.579                                                        | 10.44                                                                                  | 0.129                                                                     |
| dfAa1          | YES               | 29                   | 115                                   | 9.78                                                                  | 15.51                                                                             | 0.419                                                        | 11.51                                                                                  | 0.248                                                                     |
| dfAb161        | YES               | 31                   | 59                                    | 9.88                                                                  | 13.74                                                                             | 0.395                                                        | 9.51                                                                                   | 0.342                                                                     |
| dfAb1          | YES               | 32                   | 34                                    | 9.90                                                                  | 12.41                                                                             | 0.245                                                        | 10.20                                                                                  | 0.192                                                                     |
| dfAd79         | YES               | 33                   | 112                                   | 9.93                                                                  | 15.43                                                                             | 0.346                                                        | 8.20                                                                                   | 0.328                                                                     |
| dfBa28         | NO                | 47                   | \                                     | 11.44                                                                 | \                                                                                 | \                                                            | \                                                                                      | \                                                                         |

\*This crystal structure was not considered as a unique PPM in the previous work on the generation of key crystal structures.

Table 6: Reproduction and ranking of the most important PPMs from the original CSP study of molecule XXIII. The structures highlighted in green correspond to the experimental structures. The structures which were in the original CSP and where a good match was not found in this work are classified: in blue where they were not found by the search, in turquoise where they had a poor match in the search, and in red where structures were missed despite having a good match in the search. The structures in orange were found after  $\Psi_{mol}^{PBE0+FIT}$  at  $\Delta E_{latt} > 20$   $\text{kJ}\cdot\text{mol}^{-1}$ .

| Structure name | Found ?        | Previous CSP ranking | Ranking after $\Psi_{mol}^{PBE0+FIT}$ | $\Delta E_{latt}$ previous study/ $\text{kJ}\cdot\text{mol}^{-1}$ | $\Delta E_{latt}$ after $\Psi_{mol}^{PBE0+FIT}$ / $\text{kJ}\cdot\text{mol}^{-1}$ | PPM and $\Psi_{mol}^{PBE0+FIT}$ optimised rmsd <sub>15</sub> | $\Delta E_{latt}$ after CrystalOptimizer optimisation/ $\text{kJ}\cdot\text{mol}^{-1}$ | CrystalOptimizer and $\Psi_{mol}^{PBE0+FIT}$ optimised rmsd <sub>15</sub> |
|----------------|----------------|----------------------|---------------------------------------|-------------------------------------------------------------------|-----------------------------------------------------------------------------------|--------------------------------------------------------------|----------------------------------------------------------------------------------------|---------------------------------------------------------------------------|
| A1361          | YES            | 1                    | 1                                     | 0.00                                                              | 0.00                                                                              | 0.117                                                        | 1.27                                                                                   | 0.173                                                                     |
| A70            | YES            | 2                    | 3                                     | 1.66                                                              | 0.83                                                                              | 0.168                                                        | 0.00                                                                                   | 0.132                                                                     |
| A6494          | POOR IN SEARCH | 3                    | \                                     | 2.13                                                              | \                                                                                 | \                                                            | \                                                                                      | \                                                                         |
| A691           | YES            | 4                    | 5                                     | 3.38                                                              | 1.46                                                                              | 0.293                                                        | 0.21                                                                                   | 0.278                                                                     |
| A3457          | YES            | 5                    | 7                                     | 3.68                                                              | 2.04                                                                              | 0.312                                                        | 1.40                                                                                   | 0.212                                                                     |
| A72            | YES            | 6                    | 24                                    | 3.81                                                              | 5.47                                                                              | 0.355                                                        | 2.15                                                                                   | 0.383                                                                     |
| A424           | YES            | 7                    | 6                                     | 4.41                                                              | 1.81                                                                              | 0.253                                                        | 1.64                                                                                   | 0.253                                                                     |
| A771           | YES            | 8                    | 4                                     | 4.64                                                              | 0.85                                                                              | 0.173                                                        | 1.20                                                                                   | 0.234                                                                     |
| A191           | NO             | 9                    | \                                     | 5.07                                                              | \                                                                                 | \                                                            | \                                                                                      | \                                                                         |
| A4890          | YES            | 10                   | 66                                    | 5.46                                                              | 8.35                                                                              | 0.703                                                        | 9.04                                                                                   | 0.39                                                                      |
| A5191          | NOT IN SEARCH  | 11                   | \                                     | 5.52                                                              | \                                                                                 | \                                                            | \                                                                                      | \                                                                         |
| A272           | YES            | 12                   | 35                                    | 5.68                                                              | 6.53                                                                              | 0.664                                                        | 6.17                                                                                   | 0.545                                                                     |
| A63            | POOR IN SEARCH | 13                   | \                                     | 6.05                                                              | \                                                                                 | \                                                            | \                                                                                      | \                                                                         |
| A118           | YES            | 14                   | 2                                     | 6.13                                                              | 0.17                                                                              | 0.281                                                        | 2.69                                                                                   | 0.248                                                                     |
| A75            | YES            | 15                   | 27                                    | 6.29                                                              | 5.73                                                                              | 0.58                                                         | 2.17                                                                                   | 0.548                                                                     |
| A1413          | YES            | 16                   | 12                                    | 6.33                                                              | 3.59                                                                              | 0.133                                                        | 2.28                                                                                   | 0.189                                                                     |
| A2457          | YES            | 17                   | 34                                    | 6.66                                                              | 6.41                                                                              | 0.594                                                        | 11.13                                                                                  | 0.493                                                                     |
| A587           | YES            | 18                   | 59                                    | 6.85                                                              | 7.93                                                                              | 0.358                                                        | 7.41                                                                                   | 0.34                                                                      |
| A2417          | YES            | 19                   | 40                                    | 6.97                                                              | 6.91                                                                              | 0.434                                                        | 8.25                                                                                   | 0.392                                                                     |
| A138           | YES            | 20                   | 111                                   | 7.17                                                              | 10.02                                                                             | 0.594                                                        | 5.36                                                                                   | 0.497                                                                     |
| A227           | YES            | 21                   | 52                                    | 7.34                                                              | 7.64                                                                              | 0.3                                                          | 5.20                                                                                   | 0.281                                                                     |
| A1949          | YES            | 22                   | 279                                   | 7.61                                                              | 13.00                                                                             | 1.107                                                        | 5.34                                                                                   | 1.115                                                                     |
| A3174          | NOT IN SEARCH  | 23                   | \                                     | 7.76                                                              | \                                                                                 | \                                                            | \                                                                                      | \                                                                         |
| A2054          | NOT IN SEARCH  | 24                   | \                                     | 7.81                                                              | \                                                                                 | \                                                            | \                                                                                      | \                                                                         |
| A3023          | YES            | 25                   | 153                                   | 7.85                                                              | 10.89                                                                             | 0.27                                                         | 6.96                                                                                   | 0.241                                                                     |
| A2311          | YES            | 26                   | 216                                   | 7.86                                                              | 12.04                                                                             | 0.233                                                        | 11.15                                                                                  | 0.315                                                                     |
| A3513          | YES            | 27                   | 82                                    | 7.97                                                              | 9.09                                                                              | 0.52                                                         | 8.47                                                                                   | 0.171                                                                     |
| A1109          | YES            | 28                   | 231                                   | 7.99                                                              | 12.30                                                                             | 0.424                                                        | 6.74                                                                                   | 0.5                                                                       |
| A894           | POOR IN SEARCH | 29                   | \                                     | 8.07                                                              | \                                                                                 | \                                                            | \                                                                                      | \                                                                         |
| A1422          | YES            | 30                   | 68                                    | 8.15                                                              | 8.44                                                                              | 0.603                                                        | 9.77                                                                                   | 0.147                                                                     |
| A1127          | YES            | 31                   | 99                                    | 8.15                                                              | 9.74                                                                              | 0.376                                                        | 7.05                                                                                   | 0.38                                                                      |
| A6634          | POOR IN SEARCH | 32                   | \                                     | 8.34                                                              | \                                                                                 | \                                                            | \                                                                                      | \                                                                         |
| A282           | YES            | 33                   | 155                                   | 8.81                                                              | 10.93                                                                             | 0.213                                                        | 13.68                                                                                  | 0.341                                                                     |
| A323           | YES            | 34                   | 85                                    | 8.85                                                              | 9.16                                                                              | 0.865                                                        | 8.96                                                                                   | 0.811                                                                     |
| A2715          | YES            | 35                   | 141                                   | 8.92                                                              | 10.68                                                                             | 0.226                                                        | 10.99                                                                                  | 0.238                                                                     |
| A24995         | YES            | 36                   | 55                                    | 8.98                                                              | 7.79                                                                              | 0.248                                                        | 7.23                                                                                   | 0.141                                                                     |
| A3746          | NO             | 37                   | 233                                   | 8.99                                                              | 12.34                                                                             | 0.618                                                        | 5.26                                                                                   | 0.618                                                                     |
| A368           | YES            | 38                   | 239                                   | 9.06                                                              | 12.36                                                                             | 0.509                                                        | 7.76                                                                                   | 0.496                                                                     |
| A6738          | YES            | 39                   | 1080                                  | 9.07                                                              | 19.28                                                                             | 1.009                                                        | 11.00                                                                                  | 0.723                                                                     |
| A4228          | YES            | 40                   | 93                                    | 9.08                                                              | 9.58                                                                              | 0.533                                                        | 4.59                                                                                   | 0.524                                                                     |
| A1752          | YES            | 41                   | 13                                    | 9.16                                                              | 3.87                                                                              | 0.227                                                        | 4.26                                                                                   | 0.264                                                                     |
| A113           | YES            | 42                   | 31                                    | 9.17                                                              | 6.02                                                                              | 0.315                                                        | 4.49                                                                                   | 0.336                                                                     |
| A3750          | YES            | 43                   | 87                                    | 9.19                                                              | 9.21                                                                              | 0.198                                                        | 12.60                                                                                  | 0.197                                                                     |
| A505           | YES            | 44                   | 217                                   | 9.27                                                              | 12.06                                                                             | 0.314                                                        | 11.16                                                                                  | 0.316                                                                     |
| A12658         | YES            | 45                   | 61                                    | 9.56                                                              | 7.96                                                                              | 0.224                                                        | 6.78                                                                                   | 0.167                                                                     |
| A1918          | YES            | 46                   | 37                                    | 9.64                                                              | 6.69                                                                              | 0.797                                                        | 7.99                                                                                   | 0.367                                                                     |

|          |                   |       |      |       |       |       |       |       |
|----------|-------------------|-------|------|-------|-------|-------|-------|-------|
| A1411    | YES               | 47    | 950  | 9.72  | 18.49 | 1.035 | 20.35 | 0.21  |
| A5145    | YES               | 48    | 711  | 9.92  | 16.92 | 0.674 | 7.48  | 0.654 |
| A710     | YES               | 49    | 302  | 9.98  | 13.37 | 0.677 | 12.31 | 0.225 |
| B204     | YES               | 66    | 401  | 10.93 | 14.45 | 0.672 | 5.39  | 0.672 |
| B60      | YES               | 83    | 160  | 11.65 | 11.04 | 0.441 | 8.80  | 0.416 |
| B184     | YES (high energy) | 100   | 1379 | 12.36 | 20.69 | 0.717 | 10.22 | 0.698 |
| Exptal A | YES               | (167) | 232  | 13.60 | 12.31 | 0.664 | 10.78 | 0.601 |

Table 7: Reproduction and ranking of the most important PPMs from the original CSP study of the two tautomers of mebendazole. The structures highlighted in green correspond to the experimental structures. The structures in orange were found after  $\Psi_{mol}^{PBE0+FIT}$  at  $\Delta E_{latt} > 20$   $\text{kJ}\cdot\text{mol}^{-1}$ .

| Structure name | Found ?           | Previous CSP ranking | Ranking after $\Psi_{mol}^{PBE0+FIT}$ | $\Delta E_{latt}$ previous study/ $\text{kJ}\cdot\text{mol}^{-1}$ | $\Delta E_{latt}$ after $\Psi_{mol}^{PBE0+FIT}$ / $\text{kJ}\cdot\text{mol}^{-1}$ | PPM and $\Psi_{mol}^{PBE0+FIT}$ optimised rmsd <sub>15</sub> | $\Delta E_{latt}$ after CrystalOptimizer optimisation/ $\text{kJ}\cdot\text{mol}^{-1}$ | CrystalOptimizer and $\Psi_{mol}^{PBE0+FIT}$ optimised rmsd <sub>15</sub> |
|----------------|-------------------|----------------------|---------------------------------------|-------------------------------------------------------------------|-----------------------------------------------------------------------------------|--------------------------------------------------------------|----------------------------------------------------------------------------------------|---------------------------------------------------------------------------|
| A788           | YES               | 1                    | 1                                     | 0.00                                                              | 0.00                                                                              | 0.164                                                        | 0.00                                                                                   | 0.126                                                                     |
| A19            | YES               | 2                    | 2                                     | 2.15                                                              | 0.85                                                                              | 0.258                                                        | \                                                                                      | no overlay                                                                |
| C27            | YES               | 3                    | 3                                     | 2.54                                                              | 1.79                                                                              | 0.128                                                        | 2.66                                                                                   | 0.159                                                                     |
| C5             | YES               | 4                    | 15                                    | 2.54                                                              | 5.78                                                                              | 0.142                                                        | 2.51                                                                                   | 0.193                                                                     |
| C10            | YES               | 5                    | 6                                     | 2.63                                                              | 3.51                                                                              | 0.103                                                        | 2.31                                                                                   | 0.114                                                                     |
| A50            | YES               | 6                    | 10                                    | 3.15                                                              | 4.65                                                                              | 0.795                                                        | 4.69                                                                                   | 0.312                                                                     |
| A37            | YES               | 7                    | 5                                     | 4.07                                                              | 2.11                                                                              | 0.234                                                        | 4.41                                                                                   | 0.393                                                                     |
| C23            | YES               | 8                    | 36                                    | 4.33                                                              | 7.89                                                                              | 0.255                                                        | 6.12                                                                                   | 0.135                                                                     |
| C73            | YES               | 9                    | 51                                    | 4.33                                                              | 9.63                                                                              | 0.219                                                        | 7.95                                                                                   | 0.092                                                                     |
| C406           | YES               | 10                   | 93                                    | 4.68                                                              | 11.62                                                                             | 0.172                                                        | 12.75                                                                                  | 0.152                                                                     |
| A53            | YES               | 11                   | 11                                    | 4.81                                                              | 4.75                                                                              | 0.347                                                        | 4.67                                                                                   | 0.277                                                                     |
| C53            | YES               | 12                   | 35                                    | 5.48                                                              | 7.74                                                                              | 0.121                                                        | 5.25                                                                                   | 0.113                                                                     |
| C25            | YES               | 13                   | 18                                    | 5.50                                                              | 6.57                                                                              | 0.097                                                        | 5.22                                                                                   | 0.119                                                                     |
| A173           | YES               | 14                   | 126                                   | 5.66                                                              | 12.80                                                                             | 0.333                                                        | 10.69                                                                                  | 0.109                                                                     |
| A72            | YES               | 15                   | 101                                   | 5.75                                                              | 11.90                                                                             | 0.214                                                        | 5.79                                                                                   | 0.215                                                                     |
| A49            | YES               | 16                   | 17                                    | 5.79                                                              | 6.52                                                                              | 0.88                                                         | 6.18                                                                                   | 0.948                                                                     |
| A78            | YES               | 17                   | 12                                    | 5.93                                                              | 5.34                                                                              | 0.097                                                        | 5.73                                                                                   | 0.102                                                                     |
| A90            | YES               | 18                   | 7                                     | 5.97                                                              | 3.53                                                                              | 0.193                                                        | 5.67                                                                                   | 0.101                                                                     |
| A291           | YES               | 19                   | 23                                    | 6.14                                                              | 7.13                                                                              | 0.273                                                        | 6.85                                                                                   | 0.281                                                                     |
| C248           | YES               | 20                   | 29                                    | 6.17                                                              | 7.47                                                                              | 0.166                                                        | 6.03                                                                                   | 0.158                                                                     |
| A306           | YES               | 21                   | 91                                    | 6.27                                                              | 11.53                                                                             | 0.413                                                        | 6.53                                                                                   | 0.377                                                                     |
| C46            | YES               | 22                   | 25                                    | 6.30                                                              | 7.20                                                                              | 0.106                                                        | 7.08                                                                                   | 0.128                                                                     |
| C24            | YES               | 23                   | 22                                    | 6.36                                                              | 7.04                                                                              | 0.228                                                        | 6.69                                                                                   | 0.349                                                                     |
| C115           | YES               | 24                   | 37                                    | 6.47                                                              | 7.91                                                                              | 0.32                                                         | 6.50                                                                                   | 0.339                                                                     |
| C509           | YES               | 25                   | 72                                    | 6.61                                                              | 10.60                                                                             | 0.374                                                        | 6.81                                                                                   | 0.574                                                                     |
| C583           | YES               | 26                   | 448                                   | 6.62                                                              | 19.25                                                                             | 0.304                                                        | 14.60                                                                                  | 0.274                                                                     |
| A202           | YES               | 27                   | 20                                    | 6.72                                                              | 6.78                                                                              | 0.764                                                        | 7.78                                                                                   | 0.717                                                                     |
| C106           | YES               | 28                   | 53                                    | 6.72                                                              | 9.65                                                                              | 0.506                                                        | 6.62                                                                                   | 0.413                                                                     |
| A143           | YES               | 29                   | 28                                    | 7.19                                                              | 7.36                                                                              | 0.19                                                         | 6.94                                                                                   | 0.195                                                                     |
| A89            | YES               | 30                   | 40                                    | 7.33                                                              | 8.42                                                                              | 0.17                                                         | 7.33                                                                                   | 0.214                                                                     |
| C908           | YES               | 31                   | 43                                    | 7.42                                                              | 8.77                                                                              | 0.296                                                        | 7.51                                                                                   | 0.247                                                                     |
| CCis32         | YES (high energy) | 67                   | 578                                   | 18.00                                                             | 20.86                                                                             | 0.106                                                        | 18.82                                                                                  | 0.214                                                                     |

### 2.3.1 Correlation between DFTB-B3 energies and $\Psi_{mol}^{PBE0+FIT}$ energies for the PPMs.

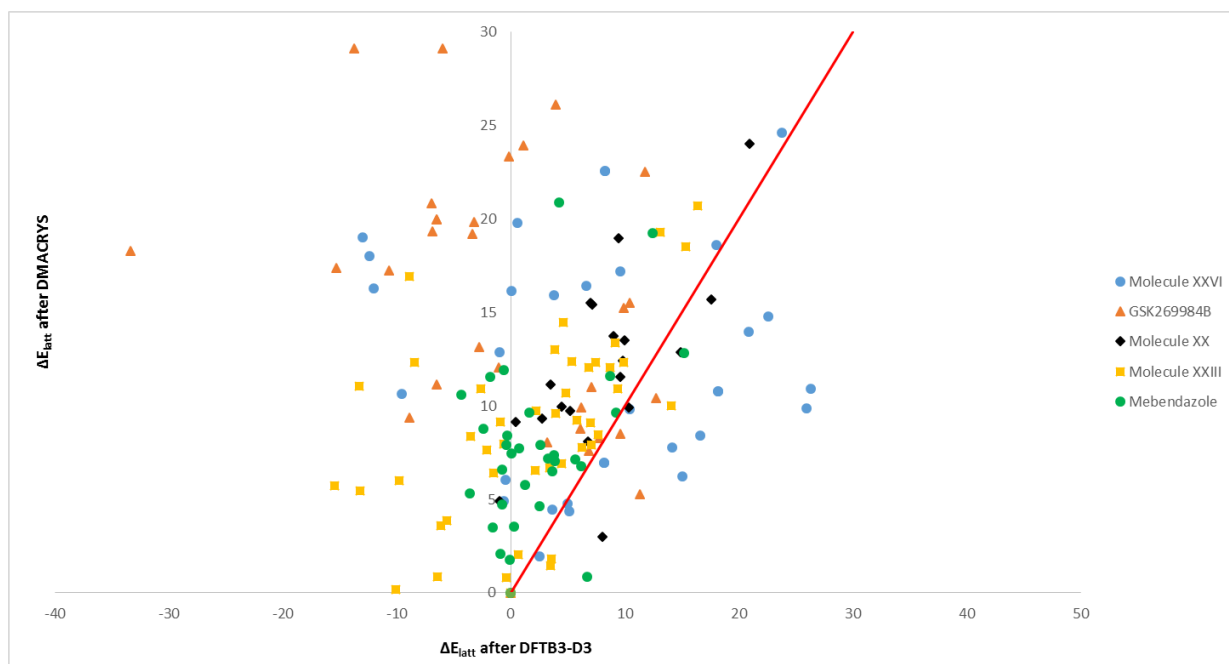

**Figure 10: Relative lattice energies of each PPM calculated with DMACRYS using the  $\Psi_{mol}^{PBE0+FIT}$  model versus the relative lattice energies calculated with DFTB3-D3. The energies are calculated relative to the structure that was the global minimum in  $E_{latt}$  with  $\Psi_{mol}^{PBE0+FIT}$ . If the relative energies were equal, they would lie on the red line. Note that the selection of structures for optimisation by  $\Psi_{mol}^{PBE0+FIT}$  was that their DFTB3-D3 energies relative to the global minimum at DFTB3-D3 level was less than 50 kJ·mol<sup>-1</sup>.**

There is virtually no correlation between the relative energies for these sets of low energy but distinct crystal structures. The lines of best fit are:

$$\Delta E_{latt}(\Psi_{mol}^{PBE0+FIT}) = -0.01 \cdot \Delta E_{latt}(\text{DFTB3-D3}) + 12.43, \text{ with } R^2=0.0006 \text{ for molecule XXVI}$$

$$\Delta E_{latt}(\Psi_{mol}^{PBE0+FIT}) = -0.27 \cdot \Delta E_{latt}(\text{DFTB3-D3}) + 15.28, \text{ with } R^2=0.1459 \text{ for GSK269984B}$$

$$\Delta E_{latt}(\Psi_{mol}^{PBE0+FIT}) = 0.69 \cdot \Delta E_{latt}(\text{DFTB3-D3}) + 6.02, \text{ with } R^2=0.5233 \text{ for molecule XX}$$

$$\Delta E_{latt}(\Psi_{mol}^{PBE0+FIT}) = 0.32 \cdot \Delta E_{latt}(\text{DFTB3-D3}) + 8.26, \text{ with } R^2=0.2448 \text{ for molecule XXIII}$$

$$\Delta E_{latt}(\Psi_{mol}^{PBE0+FIT}) = 0.41 \cdot \Delta E_{latt}(\text{DFTB3-D3}) + 6.76, \text{ with } R^2=0.1639 \text{ for mebendazole}$$



### 2.3.2 Reproduction of the PPMs of molecule XX produced with the RCM method

**Table 8: Reproduction and ranking of the 10 lowest-energy PPMs from the CSP study of molecule XX performed with the RCM method. The structure highlighted in green corresponds to the experimental structure. The structures in orange were found after  $\Psi_{mol}^{PBE0+FIT}$  at  $\Delta E_{latt} > 20$  kJ·mol<sup>-1</sup>.**

| Structure name | Found ?           | RCM ranking | Ranking after $\Psi_{mol}^{PBE0+FIT}$ | $\Delta E_{latt}$ RCM/kJ·mol <sup>-1</sup> | $\Delta E_{latt}$ after $\Psi_{mol}^{PBE0+FIT}$ /kJ·mol <sup>-1</sup> | rmsd <sub>15</sub> between PPM and produced with new method |
|----------------|-------------------|-------------|---------------------------------------|--------------------------------------------|-----------------------------------------------------------------------|-------------------------------------------------------------|
| frm_0001       | YES               | 1           | 1                                     | 0                                          | 0.00                                                                  | 0.881                                                       |
| frm_0002       | YES (high energy) | 2           | 1752                                  | 0.52                                       | 25.97                                                                 | 0.644                                                       |
| frm_0003       | YES               | 3           | 112                                   | 1.79                                       | 15.43                                                                 | 0.543                                                       |
| frm_0004       | YES               | 4           | 214                                   | 1.79                                       | 17.61                                                                 | 0.519                                                       |
| frm_0005       | YES               | 5           | 34                                    | 2.87                                       | 12.41                                                                 | 0.595                                                       |
| frm_0006       | YES (high energy) | 6           | 831                                   | 2.99                                       | 22.80                                                                 | 0.627                                                       |
| frm_0007       | YES               | 7           | 72                                    | 3.3                                        | 14.51                                                                 | 0.394                                                       |
| frm_0008       | YES               | 8           | 112                                   | 3.91                                       | 15.43                                                                 | 0.319                                                       |
| frm_0009       | YES               | 9           | 275                                   | 3.98                                       | 18.46                                                                 | 0.665                                                       |
| frm_0010       | YES (high energy) | 10          | 1210                                  | 4.19                                       | 24.26                                                                 | 0.377                                                       |

### 2.3.3 Optimisation of some Z'=2 putative crystal structures of molecule XX.

In the 5th Blind Test, Neumann *et al.* performed a Z'=2 search with GRACE and showed that some computer-generated Z'=2 crystal structures were competitive in  $E_{latt}$  with the Z'=1 observed form. Table 9 shows that an optimisation with DFTB3-D3 and  $\Psi_{mol}^{PBE0+FIT}$  also finds some of those Z'=2 structures competitive with the observed form, with one being even slightly more stable.

**Table 9: Relative lattice energies after DFTB3-D3 and  $\Psi_{mol}^{PBE0+FIT}$  of the eight lowest energy Z'=2 crystal structures in the refined extended list submitted by Neumann *et al.* for the 5th Blind Test. The energies are calculated relative to the structure matching the experimental form, which is also the  $E_{latt}$  global minimum in our study.**

| Structure name | $\Delta E_{latt}$ after $\Psi_{mol}^{PBE0+FIT}$ /kJ·mol <sup>-1</sup> |
|----------------|-----------------------------------------------------------------------|
| Grace_Z2_1     | 18.65                                                                 |
| Grace_Z2_2     | -0.17                                                                 |
| Grace_Z2_3     | 16.21                                                                 |
| Grace_Z2_4     | 19.92                                                                 |
| Grace_Z2_5     | 5.98                                                                  |
| Grace_Z2_6     | 3.50                                                                  |
| Grace_Z2_7     | 4.34                                                                  |
| Grace_Z2_8     | <i>failed optimisation</i>                                            |

#### 2.4 Phonon calculations

Given the high computational cost of the phonon calculations, only a small sample of low-energy crystal structures underwent this step. Structures matching the experimentally-known forms and, if present, the unobserved  $E_{\text{latt}}$  global minima, were always selected; the rest of the selected crystal structures were representative of competitive hypothetical polymorphs, chosen for their energy competitiveness and/or their packing properties. Note that forms C and E of molecule XXIII were not present in this study, since they are  $Z'=2$ ; hence they were optimised with the same method proposed in this paper starting from the experimental crystal structures and then the free energies were calculated with both methods.

Table 10: Structures selected for phonon calculations for each molecule. For each structure the identifier is indicated, together with its density and  $E_{latt}$  after the DMACRYS optimisations with  $\Psi_{mol}^{PBE0+FIT}$ , the variations in  $F_{vib}$  and in the Helmholtz free energies ( $A$ ), calculated using the rigid body and the DFTB3-D3 models, relative to the global minimum in  $E_{latt}$ , and the supercell used to calculate the DFTB3-D3 phonons. Structures corresponding to the experimentally-known forms are outlined in green; as yet unobserved  $E_{latt}$  minima are in orange; note that forms C and E of XXIII were not present in the search, since they are  $Z'=2$ , and were optimised independently for comparison purposes. The first letter in the identifier of the mebendazole crystal structures indicates whether they contained the A or C tautomers.

| Molecule XXVI  |                            |                                  |                                                  |                                            |                                                |                                          |                    |
|----------------|----------------------------|----------------------------------|--------------------------------------------------|--------------------------------------------|------------------------------------------------|------------------------------------------|--------------------|
| Structure      | Density/g·cm <sup>-3</sup> | $E_{latt}$ /kJ·mol <sup>-1</sup> | $\Delta F_{vib}$ rigid body/kJ·mol <sup>-1</sup> | $\Delta A$ rigid body/kJ·mol <sup>-1</sup> | $\Delta F_{vib}$ DFTB3-D3/kJ·mol <sup>-1</sup> | $\Delta A$ DFTB3-D3/kJ·mol <sup>-1</sup> | DFTB3-D3 supercell |
| C26_863        | 1.388                      | -211.84                          | 0.00                                             | 0                                          | 0.00                                           | 0                                        | 222                |
| C124_2         | 1.331                      | -209.88                          | -0.31                                            | 1.65                                       | -3.36                                          | -1.40                                    | 222                |
| C1_134         | 1.333                      | -207.39                          | -0.24                                            | 4.21                                       | -3.16                                          | 1.29                                     | 111                |
| C41_619        | 1.361                      | -205.82                          | -0.87                                            | 5.15                                       | -4.78                                          | 1.25                                     | 222                |
| C805_7         | 1.393                      | -200.95                          | 0.24                                             | 11.14                                      | -6.25                                          | 4.64                                     | 222                |
| GSK269984B     |                            |                                  |                                                  |                                            |                                                |                                          |                    |
| Structure      | Density/g·cm <sup>-3</sup> | $E_{latt}$ /kJ·mol <sup>-1</sup> | $\Delta F_{vib}$ rigid body/kJ·mol <sup>-1</sup> | $\Delta A$ rigid body/kJ·mol <sup>-1</sup> | $\Delta F_{vib}$ DFTB3-D3/kJ·mol <sup>-1</sup> | $\Delta A$ DFTB3-D3/kJ·mol <sup>-1</sup> | DFTB3-D3 supercell |
| C1_60          | 1.497                      | -173.71                          | 0.00                                             | 0                                          | 0                                              | 0                                        | 222                |
| C1_240         | 1.494                      | -171.17                          | -1.71                                            | 0.83                                       | 3.23                                           | 5.78                                     | 222                |
| C1_1165        | 1.506                      | -170.14                          | -1.72                                            | 1.86                                       | 2.15                                           | 5.72                                     | 222                |
| C1_685         | 1.479                      | -169.86                          | 0.30                                             | 4.15                                       | -3.18                                          | 0.67                                     | 211                |
| C1_2_1         | 1.484                      | -165.01                          | 2.09                                             | 10.79                                      | 0.01                                           | 8.71                                     | 141                |
| Molecule XX    |                            |                                  |                                                  |                                            |                                                |                                          |                    |
| Structure      | Density/g·cm <sup>-3</sup> | $E_{latt}$ /kJ·mol <sup>-1</sup> | $\Delta F_{vib}$ rigid body/kJ·mol <sup>-1</sup> | $\Delta A$ rigid body/kJ·mol <sup>-1</sup> | $\Delta F_{vib}$ DFTB3-D3/kJ·mol <sup>-1</sup> | $\Delta A$ DFTB3-D3/kJ·mol <sup>-1</sup> | DFTB3-D3 supercell |
| C1_9           | 1.382                      | -218.52                          | 0.00                                             | 0                                          | 0                                              | 0                                        | 111                |
| C1_60          | 1.330                      | -215.54                          | -1.05                                            | 1.93                                       | 6.32                                           | 8.25                                     | 411                |
| C1_250         | 1.393                      | -213.61                          | 1.43                                             | 6.34                                       | 2.86                                           | 9.20                                     | 121                |
| C78_1191       | 1.315                      | -211.12                          | 1.63                                             | 9.03                                       | 2.37                                           | 11.41                                    | 121                |
| C78_28         | 1.347                      | -210.45                          | -0.53                                            | 7.54                                       | -2.60                                          | 4.94                                     | 111                |
| C245_91        | 1.328                      | -199.71                          | -0.30                                            | 18.5                                       | 0.57                                           | 19.08                                    | 111                |
| Molecule XXIII |                            |                                  |                                                  |                                            |                                                |                                          |                    |
| Structure      | Density/g·cm <sup>-3</sup> | $E_{latt}$ /kJ·mol <sup>-1</sup> | $\Delta F_{vib}$ rigid body/kJ·mol <sup>-1</sup> | $\Delta A$ rigid body/kJ·mol <sup>-1</sup> | $\Delta F_{vib}$ DFTB3-D3/kJ·mol <sup>-1</sup> | $\Delta A$ DFTB3-D3/kJ·mol <sup>-1</sup> | DFTB3-D3 supercell |
| C1_13          | 1.387                      | -179.40                          | 0.00                                             | 0                                          | 0                                              | 0                                        | 212                |
| C1_60          | 1.394                      | -179.22                          | -0.25                                            | -0.08                                      | -0.95                                          | -1.03                                    | 222                |
| C1_43          | 1.402                      | -178.57                          | -0.80                                            | 0.03                                       | -0.50                                          | -0.47                                    | 231                |
| C103_31        | 1.410                      | -178.55                          | 0.70                                             | 1.55                                       | 0.86                                           | 2.41                                     | 311                |
| C1_889         | 1.342                      | -169.14                          | -2.46                                            | 7.81                                       | -2.79                                          | 5.02                                     | 221                |
| C49_1002       | 1.411                      | -169.09                          | -0.60                                            | 9.71                                       | -1.90                                          | 7.81                                     | 221                |
| C103_847       | 1.345                      | -167.08                          | -1.15                                            | 11.17                                      | 0.86                                           | 12.02                                    | 221                |
| Form C         | 1.402                      | -172.28                          | -1.21                                            | 5.91                                       | -1.33                                          | 4.58                                     | 221                |
| Form E         | 1.366                      | -170.88                          | -1.36                                            | 7.16                                       | -2.44                                          | 4.72                                     | 221                |
| Mebendazole    |                            |                                  |                                                  |                                            |                                                |                                          |                    |
| Structure      | Density/g·cm <sup>-3</sup> | $E_{latt}$ /kJ·mol <sup>-1</sup> | $\Delta F_{vib}$ rigid body/kJ·mol <sup>-1</sup> | $\Delta A$ rigid body/kJ·mol <sup>-1</sup> | $\Delta F_{vib}$ DFTB3-D3/kJ·mol <sup>-1</sup> | $\Delta A$ DFTB3-D3/kJ·mol <sup>-1</sup> | DFTB3-D3 supercell |
| A_C1_5         | 1.395                      | -176.73                          | 0.00                                             | 0                                          | 0                                              | 0                                        | 221                |
| A_C1_47        | 1.406                      | -175.87                          | 0.14                                             | 1.00                                       | -1.14                                          | -0.14                                    | 211                |
| A_C1_6         | 1.430                      | -174.91                          | 1.43                                             | 3.25                                       | 0.77                                           | 4.02                                     | 111                |
| C_C1_39        | 1.395                      | -174.94                          | 0.63                                             | 2.42                                       | -3.72                                          | -1.29                                    | 111                |
| C_C1_28        | 1.397                      | -170.94                          | 0.28                                             | 6.06                                       | -1.63                                          | 4.43                                     | 221                |
| C_C1_2270      | 1.370                      | -169.96                          | -0.29                                            | 6.48                                       | -3.38                                          | 3.10                                     | 211                |

## 2.5 Computational cost

**Table 11: Breakdown of the computational cost for optimising and re-ranking the CrystalPredictor generated crystal structures for each molecule with the method outlined in this study. The cost of the phonon calculations is not included in the total, to have a more meaningful comparison with the original CSP studies for which only  $E_{\text{latt}}$  was calculated.**

|                                      | XXVI          | GSK269984B   | XXIII         | XX            | Mebendazole  |
|--------------------------------------|---------------|--------------|---------------|---------------|--------------|
| DFTB Optimisation cost/ hours        | 10,927        | 4,829        | 8,386         | 12,723        | 2,215        |
| DFTB clustering cost/ hours          | 109           | 156          | 618           | 1,306         | 37           |
| DMACRYS Optimisation cost/ hours     | 4,426         | 2,911        | 6,903         | 14,674        | 2,300        |
| <b>Total cost/ hours</b>             | <b>15,462</b> | <b>7,896</b> | <b>15,907</b> | <b>28,703</b> | <b>4,552</b> |
| DFTB3-D3 phonon calculations/hours   | 1,844         | 344          | 984           | 512           | 99           |
| Rigid body phonon calculations/hours | 5             | 3            | 9             | 6             | 7            |

**Table 12: Breakdown of the computational cost for optimising and re-ranking the CrystalPredictor generated crystal structures for each molecule in the original CSP studies.**

| Step                                                 | XXVI                 | GSK269984B          | XXIII                | XX                   | Mebendazole          |
|------------------------------------------------------|----------------------|---------------------|----------------------|----------------------|----------------------|
| Cost of single iteration of CrystalOptimizer/ hours  | 138,080              | <i>Not recorded</i> | <i>Not performed</i> | <i>Not performed</i> | 1,758                |
| Cost of single-point calculation with DMACRYS/ hours | <i>Not performed</i> | <i>Not recorded</i> | 24,000               | <i>Not performed</i> | <i>Not performed</i> |
| Cost of full CrystalOptimizer optimisation/ hours    | 96,299               | <i>Not recorded</i> | 35,000               | 100,000              | 4,847                |
| <b>Total cost/ hours</b>                             | <b>234,379</b>       | <i>Not recorded</i> | <b>59,000</b>        | <b>100,000</b>       | <b>6,605</b>         |

**Table 13: Comparison between the computational costs needed to optimise and re-rank the search-generated structures with the method outlined here and in the previous CSP studies.**

| Molecule    | CPU hours previous study | CPU hours new method | % difference |
|-------------|--------------------------|----------------------|--------------|
| XXVI        | 234,379                  | 15,462               | -93          |
| GSK269984B  | <i>Not recorded</i>      | 7,896                | /            |
| XX          | 100,000                  | 28,703               | -71          |
| XXIII       | 59,000                   | 15,907               | -73          |
| Mebendazole | 6,605                    | 4,552                | -31          |

These values are dependent on the computer hardware used. The current study was performed on a large cluster of Intel Xeon 2.3 GHz processors, which was used for the previous CSP studies only for mebendazole.
